# Supplementary material for: A review of fossil scorpion higher systematics
Source: PeerJ journal article supplement (doi:10.7717/peerj.18557), 2024-12-06

The distribution of scorpion fossil ages – 1850

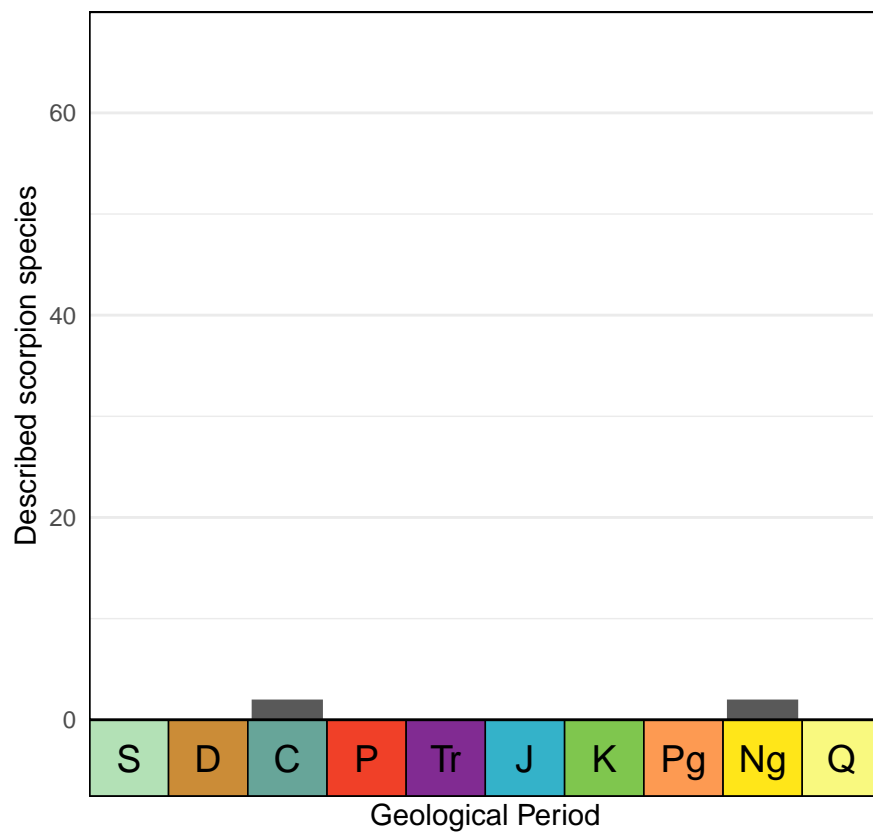

The distribution of scorpion fossil ages – 1870

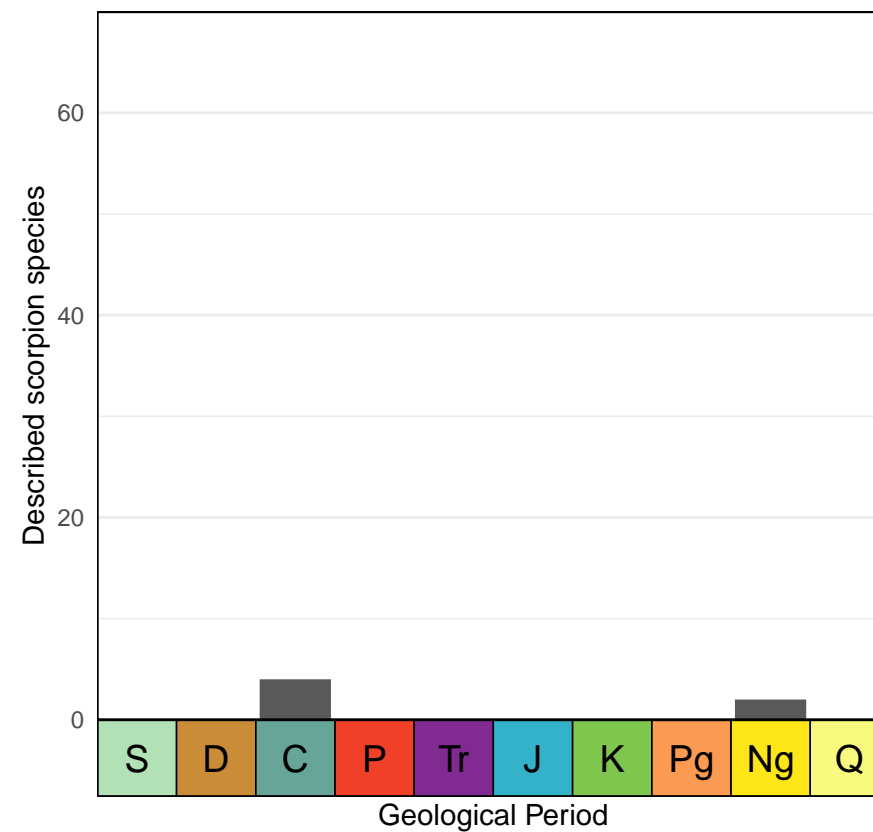

The distribution of scorpion fossil ages – 1890

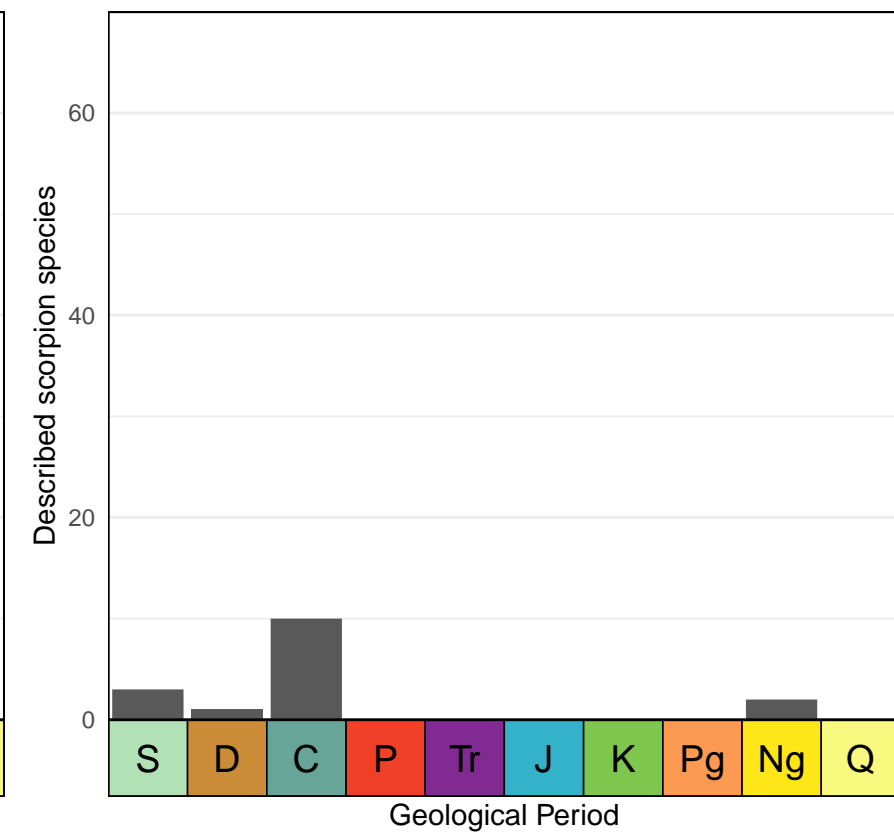

The distribution of scorpion fossil ages – 1910

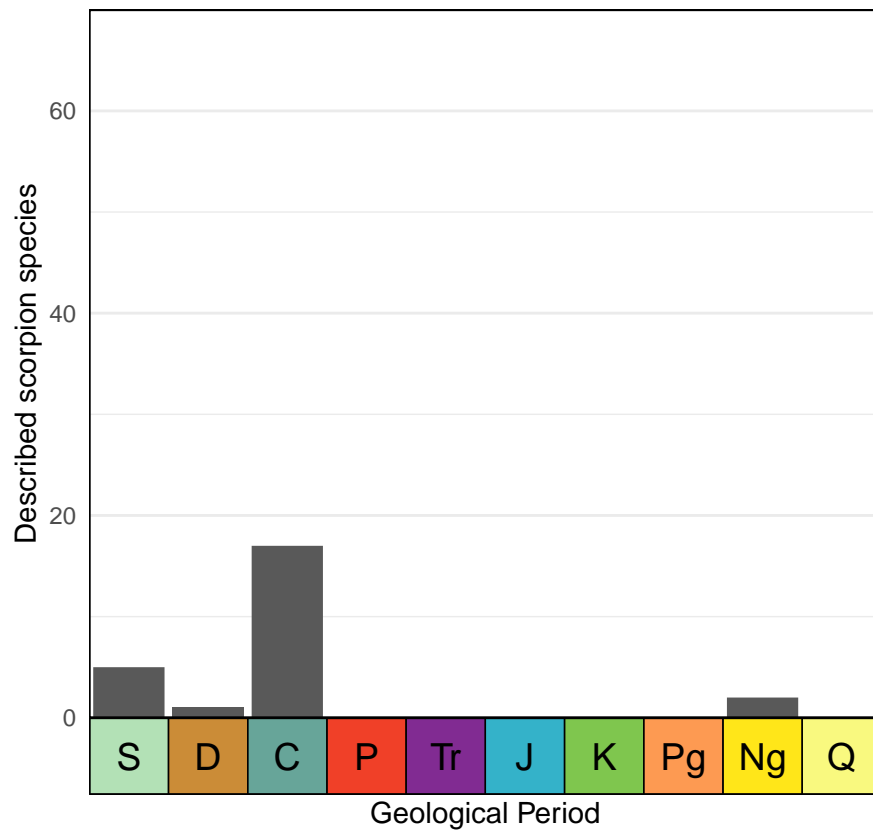

The distribution of scorpion fossil ages – 1930

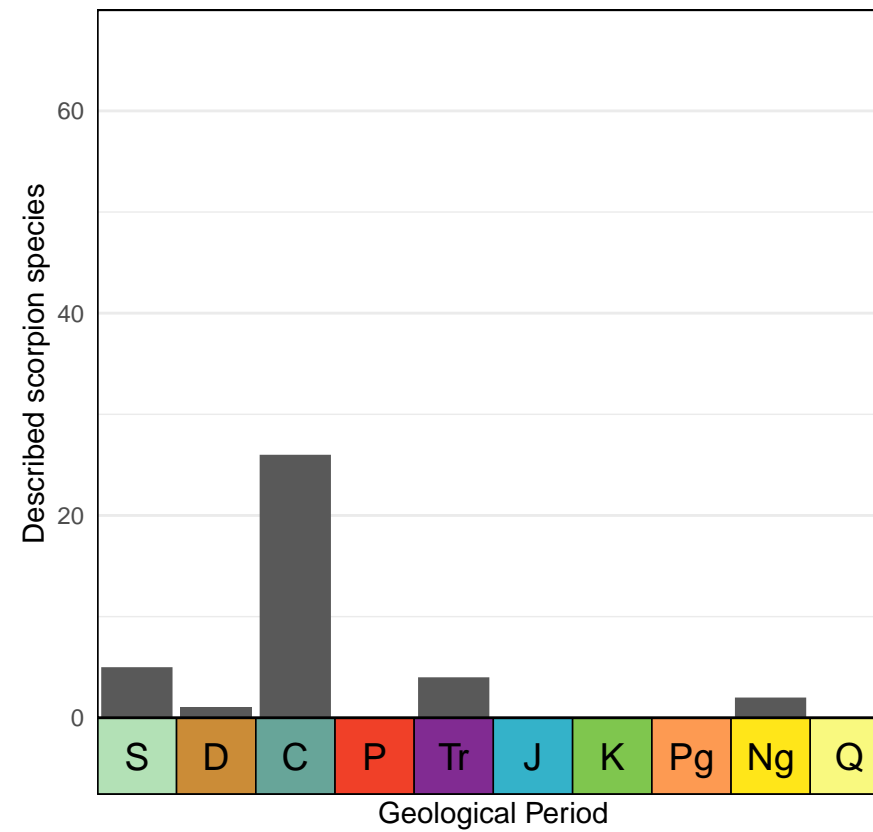

The distribution of scorpion fossil ages – 1950

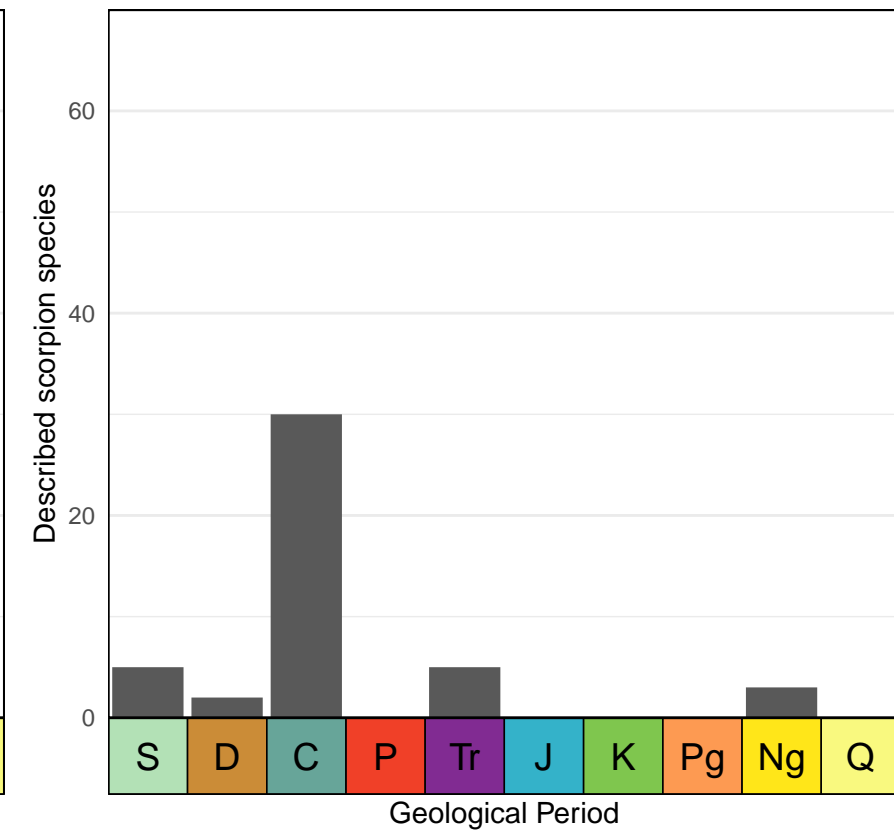

The distribution of scorpion fossil ages – 1970

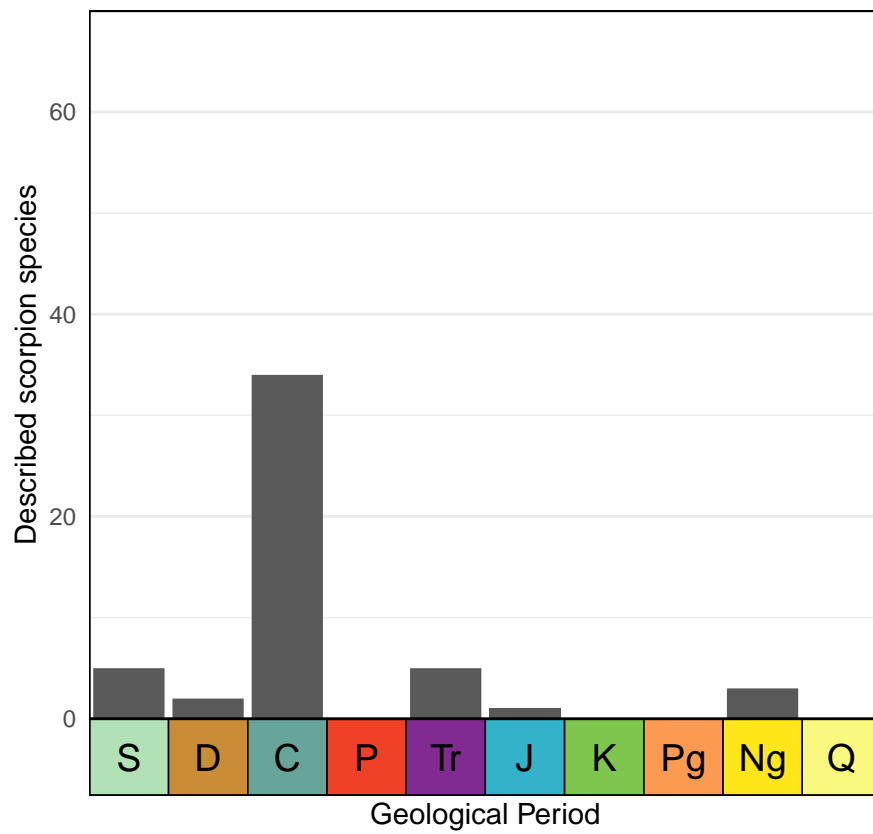

The distribution of scorpion fossil ages – 1990

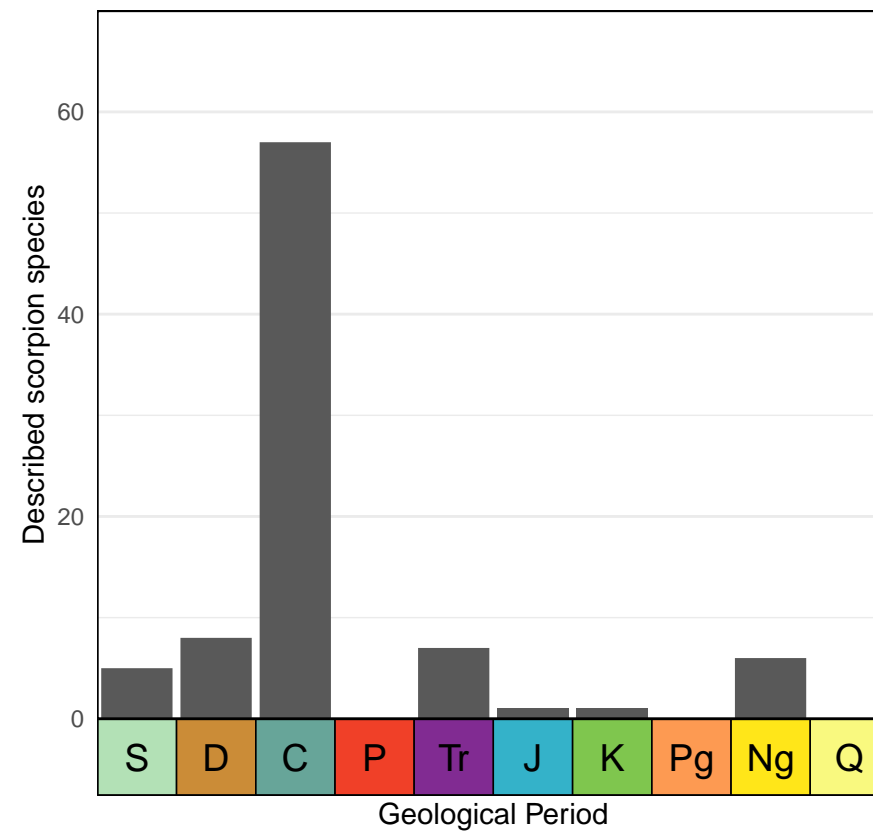

The distribution of scorpion fossil ages – 2010

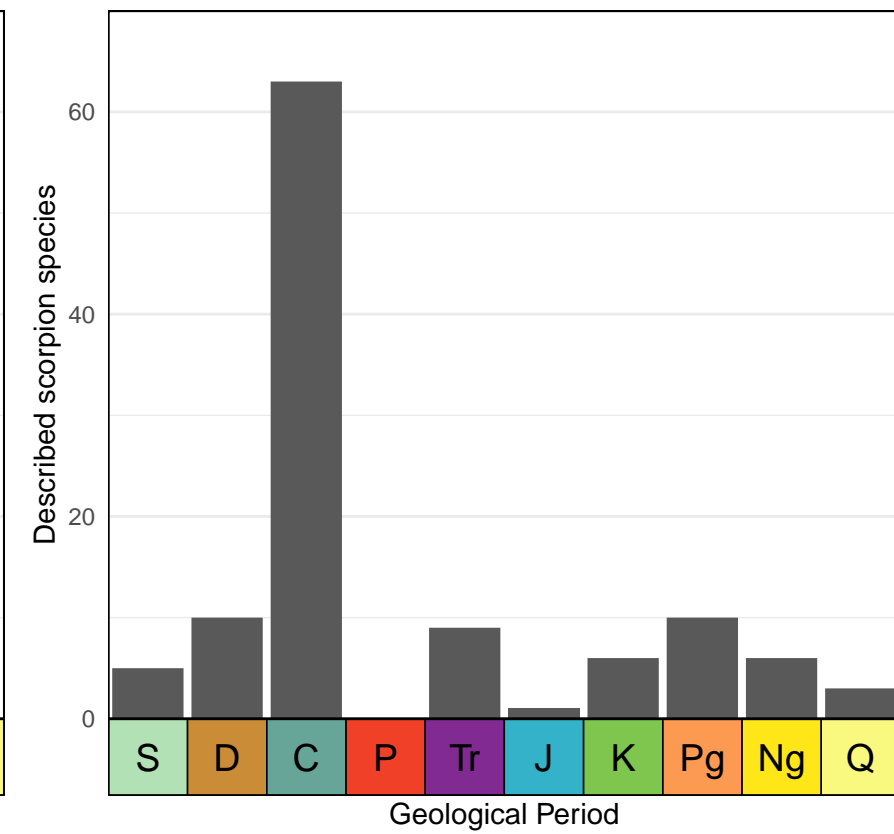

Supplement: Dunlop_Garwood_2024_SI.zip [file Dunlop_Garwood_2024_SI.zip]
